# 1           **Temperature and photoperiod influence survival and** 2           **biomarkers of senescence in common woodlouse**

3  
4   Charlotte DEPEUX<sup>1, 2\*</sup>, Ascel SAMBA-LOUAKA<sup>1</sup>, Christine BRAQUART-VARNIER<sup>1</sup>,  
5           Jérôme MOREAU<sup>3</sup>, Jean-François LEMAÎTRE<sup>2</sup>, Tiffany LAVERRE<sup>1</sup>, Hélène  
6           PAUHLAC<sup>1</sup>, François-Xavier DECHAUME-MONCHARMONT<sup>3</sup>, Jean-Michel  
7                           GAILLARD<sup>2</sup>, Sophie BELTRAN-BECH<sup>1</sup>

8  
9  
10   <sup>1</sup> Université de Poitiers, Laboratoire Ecologie et Biologie des interactions, UMR CNRS 7267, 5 rue Albert  
11   Turpin, TSA 51106 86073 POITIERS Cedex 9, France.

12   <sup>2</sup> Université de Lyon, F-69000, Lyon; Université Lyon 1; CNRS, UMR5558, Laboratoire de Biométrie et  
13   Biologie Evolutive, F-69622, Villeurbanne, France

14   <sup>3</sup> Biogéosciences, UMR 6282 CNRS, Université Bourgogne Franche-Comté, 6 Boulevard Gabriel,  
15   21000 Dijon, France.

16  
17   \* Corresponding author: [charlotte.depeux@gmail.com](mailto:charlotte.depeux@gmail.com)

18  
19   All authors have seen and approved the manuscript, and that it hasn't been accepted  
20   or published elsewhere.

## 21 22 23   **Abstract**

24   Most living organisms display a decline in physiological performances when ageing, a  
25   process called senescence that is most often associated with increased mortality risk.  
26   Previous researches have shown that both the timing and the intensity of senescence  
27   vary a lot within and among species, but the role of environmental factors in this  
28   variation is still poorly understood. To fill this knowledge gap, we investigated the  
29   impact of environmental conditions on the strength of senescence using an  
30   experimental design applied to a population of common woodlouse *Armadillidium*  
31   *vulgare* intensively monitored in the lab. As no cellular senescence biomarker was  
32   available in woodlouse, our first step was to identify two biomarkers of senescence in  
33   this species: the  $\beta$ -galactosidase activity and the profile of immune cells. These  
34   biomarkers provided evidence of sex-specific senescence patterns, with a higher  $\beta$ -

35 galactosidase activity and lower immune cell viability in females than in males at old  
36 age. We then tested the impact of environmental conditions, through changes in  
37 temperature and photoperiod, on these biomarkers. We found different effects of the  
38 environmental changing: The increasing of day light modification led the same  
39 effect as age on our senescence biomarkers while temperature modifications led  
40 the opposite effect as age on the  $\beta$ -galactosidase activity and cell size. We also  
41 demonstrated the existence of sex-specific responses to changes in environmental  
42 conditions. By using an experimental approach and new biomarkers of senescence in  
43 woodlouse, we show that environmental conditions and sex both shape the diversity  
44 observed in senescence patterns of woodlouse and underline the importance of  
45 identifying senescence biomarkers to understand how environmental conditions  
46 influence the evolution of senescence.

47

#### 48 **Keywords**

49 *Armadillidium vulgare*, cellular senescence, immunosenescence, environmental  
50 impact, invertebrates

51

#### 52 **1. Introduction**

53 Senescence is generally defined as a progressive decline in physiological  
54 performances that leads to a decrease in the probability to reproduce (i.e. reproductive  
55 senescence) or survive (i.e. actuarial senescence) with increasing age (Monaghan et  
56 al., 2008). This process is nearly ubiquitous in the living world (Nussey et al., 2013) but  
57 display a tremendous diversity of patterns across the tree of life (Jones et al., 2014).  
58 Whatever the studied trait, both timing and intensity of senescence strongly vary across  
59 species (e.g. Nussey et al., 2011), populations (e.g. Tidière et al., 2016), and  
60 individuals (e.g. Bérubé et al., 1999). Many studies aiming to understand the diversity  
61 of senescence patterns at different levels of the biological organization have suggested  
62 that environmental conditions are likely to play a significant role (Fontana et al., 2010;  
63 Martin et al., 1996; Hassall et al. 2017). For instance, resource competition in early life  
64 can strengthen both actuarial and body mass senescence in wild populations of  
65 mammals (Nussey et al., 2007; Beirne et al., 2015). However, environmental  
66 conditions can potentially influence senescence in a sex-specific way, as evidenced  
67 for other life-history traits. For instance, in the neriid fly (*Telostylinus angusticollis*), a  
68 dietary restriction caused the complete female infertility, whereas in males, the

69 negative effect of dietary restriction on reproduction was effective only when they  
70 received a rich larval diet and when they were housed with females (Adler et al., 2013).  
71 In the Alpine marmot, (*Marmota marmota*), the social environment lead strongly  
72 different actuarial senescence patterns between males and females (Berger et al.,  
73 2018). Sex-specific effects of environmental conditions on senescence thus need to  
74 be investigated. Moreover, to thoroughly understand how environmental conditions  
75 modulate observed patterns of senescence, their specific impact on organisms must  
76 be separately quantified. Here, we provide such a study by investigating cellular  
77 senescence in the common woodlouse *Armadillidium vulgare*. This terrestrial isopod  
78 can live up to three years (Paris and Pitelka, 1962) and is highly sensitive to  
79 environmental conditions, especially when they involve changes in photoperiod and  
80 temperature. In fact, these parameters are closely related to reproduction and water  
81 loss (Mocquard et al., 1989; Smigel and Gibbs, 2008). Overall, woodlouse can be  
82 easily controlled and monitored in the laboratory and thereby constitute a very relevant  
83 model to test whether and how environmental conditions impact senescence patterns.

84 Biomarkers of senescence correspond to biological parameters that allow  
85 predicting the functional capability of an organism better than its chronological age  
86 (Baker and Sprott, 1988). At the cellular scale, senescence corresponds to the cellular  
87 deterioration leading stop of the cellular cycle (Campisi and di Fagagna, 2007). As  
88 ageing is associated with cellular senescence (Herbig et al., 2006; Lawless et al., 2010;  
89 Wang et al., 2009), cellular biomarkers provide reliable metrics to study senescence.  
90 One of the most popular biomarker of senescence is based on the lysosomal activity  
91 of the  $\beta$ -galactosidase enzyme, which increases when the cell enters in senescence  
92 (Dimri et al., 1995; Itahana et al., 2007). The activity of the  $\beta$ -galactosidase has mostly  
93 been used to study the senescence of mammalian cells (Gary and Kindell, 2005), but  
94 has also been successfully used to detect both senescence in honeybees (Hsieh and  
95 Hsu, 2011) and effect of lower temperature on senescence of the short-lived fish  
96 *Nothobranchius furzeri* (Valenzano et al., 2006). Likewise, the decline in immune  
97 performance with increasing age (i.e. immunosenescence) can also provide a suitable  
98 biomarker of senescence. A diminution of the number of effective immune cells has  
99 thus been reported in wild vertebrates (Cheynel et al., 2017) but also in invertebrates  
100 including mosquitoes *Aedes aegypti* (Hillyer et al., 2004) and crickets *Gryllus assimilis*  
101 (Park et al., 2011). In this later species, the immunosenescence also involves a  
102 decrease of the melanotic module formation, which increases damage of immune cells,

103 and then modifies the immune cell composition (Park et al., 2011). Moreover,  
104 senescent cells are bigger than non-senescent cells (Hayflick, 1965; Rodier and  
105 Campisi, 2011). Overall the viability and the size of immune cells reliably indicate the  
106 level of individual immunosenescence. In biomedical research, biomarkers of  
107 immunosenescence are routinely used to assess the role of stressful environmental  
108 conditions on ageing (Piazza et al., 2010).

109 In this study, we first looked for senescence biomarkers specific to *A. vulgare*  
110 based on empirical studies performed in invertebrates and on previous reports on age-  
111 specific changes in the density of immune cells (Sicard et al., 2010). We expected both  
112 an increase in  $\beta$ -galactosidase activity and a decrease of immune cell viability and  
113 density with increasing age. Then, we quantified the impact of changes in temperature  
114 and photoperiod on these biomarkers. We thus experimentally tested the response of  
115 two cellular biomarkers of senescence to a large range of variation in both temperature  
116 and photoperiod. We expected the effect of temperature and photoperiod to shape  
117 specific variations on these senescence biomarkers and survival in females and males  
118 woodlouse.

119

## 120 **2. Materials & Methods**

121

### 122 **2.1. Biological model**

123 Individual *A. vulgare* used in the following experiments were derived from wild  
124 populations and have been monitored in lab conditions over ten years. Individuals have  
125 been maintained on moistened soil with the natural photoperiod of Poitiers (France  
126 46.58°N, 0.34°E, 20°C) at 20°C with food (i.e. dried linden leaves and carrots) *ad*  
127 *libitum*. Crosses were monitored to control genetic diversity. For each clutch obtained,  
128 individuals were sexed, and brothers and sisters were separated to ensure virginity.  
129 In common woodlouse, individuals moult throughout their lives according to a molting  
130 cycle (Lawlor, 1976). At 20°C, they approximately moult once per month (Steel, 1980)  
131 and all the cells of the concerned tissues are renewed. However, the brain, the nerve  
132 cord, part of the digestive tract and gonads are not part of tissues renewed during  
133 molting and are therefore good candidates for tissue-specific study of senescence in  
134 this species. In addition to molting regularly, the female woodlouse exhibits specific  
135 molts related to reproduction (Moreau and Rigaud, 2002). These molts and more  
136 generally the onset of reproduction are influenced by environmental conditions: both

137 increased temperature and longer days stimulate the onset of reproduction (Mocquard  
 138 et al., 1989). The reproductive period occurs during spring.

139

## 140 2.2. Experimental design

141 We tested the effect of environmental factors on senescence in *A. vulgare* in two  
 142 steps. We first developed biomarkers of senescence using individuals living in non-  
 143 stressful conditions. Second, we tested the impact of changes in temperature and  
 144 photoperiod on the survival and on our set of biomarkers (Figure 1). The different  
 145 protocols were applied to males and females separately to assess the effect of sex on  
 146 senescence patterns.

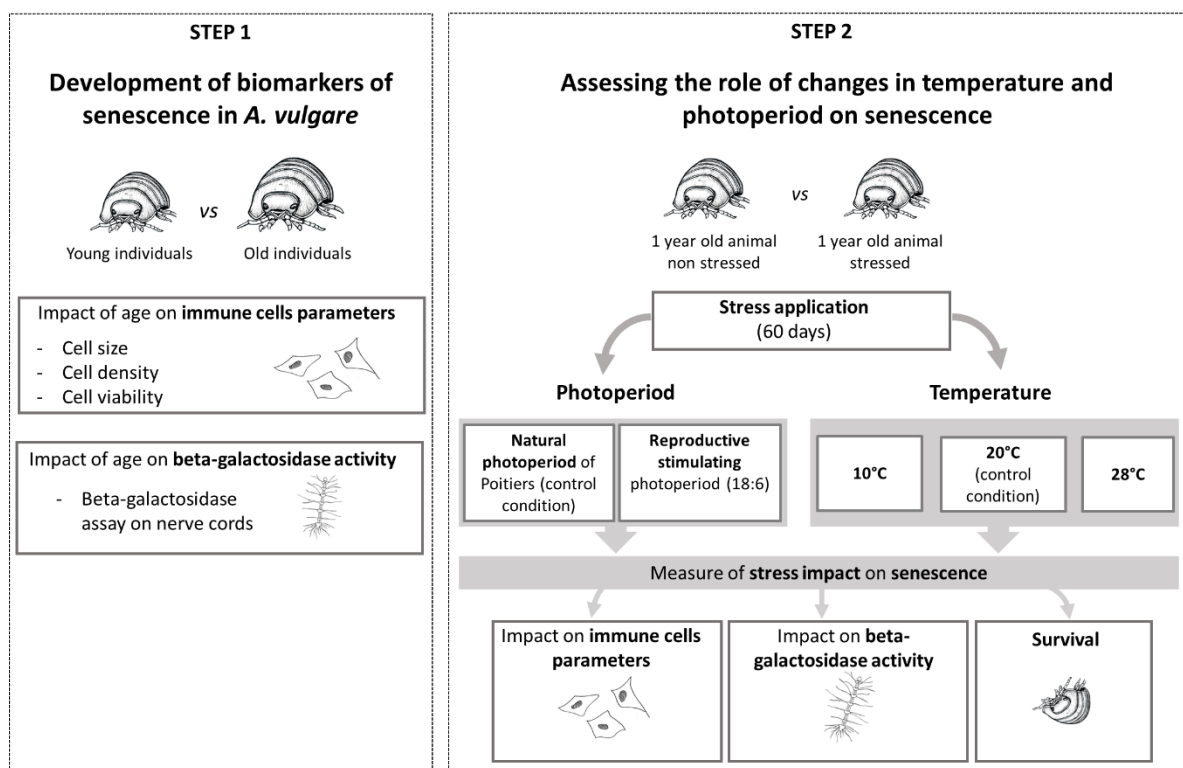

**Figure 1: Experimental Design**

The experiment was conducted in two steps. In step 1, 60 individuals (30 one-year-old, 15 males and 15 females, and 30 three-years-old, 15 males and 15 females) were used to test the impact of ageing on immune cell parameters and 180 individuals (90 six-months-old, 45 males and 45 females, and 90 two-years-old, 45 males and 45 females) were used to test the impact of ageing on  $\beta$ -galactosidase activity. In step 2, 600 individuals were used to test the impact of changes in temperature and photoperiod on survival and biomarkers of senescence: 120 individuals by experimental (or control) condition composed of 60 females and 60 males. We estimated 60 days after exposure to different temperature and photoperiod conditions the survival of these 120 individuals (by condition). More specifically, 30 (15 males and 15 females) individuals were sampled to measure the impact of changes in temperature and in photoperiod on immune cells and on  $\beta$ -galactosidase activity using the photoperiod experimental or control protocols and the temperature protocols at 10°C and 20°C. For the temperature protocol at 28°C, fewer females (25) and males (20) were sampled because of the lower survival rate under these conditions.

147

## 148 2.3. Step 1: Development of biomarkers of senescence in *A. vulgare*

### 149 Biological material

150 To test the impact of age on the immune cell parameters (i.e. density, viability,  
151 and size) that were candidates for providing biomarkers of senescence in *A. vulgare*,  
152 60 mature individuals were used: 30 young (i.e. 1-year-old, 15 males and 15 females)  
153 and 30 old (3-years-old, 15 males and 15 females). As the number of 3-years-old  
154 individuals was low, and the establishment of these two biomarkers were set-up  
155 independently, we used 2-years-old individuals to study the impact of age on  $\beta$ -  
156 galactosidase activity. Thus, 180 individuals (90 six-months-old individuals, 45 males  
157 and 45 females) and 90 two-years-old individuals, 45 males and 45 females) were  
158 used (Figure 1).

159

### 160 **Measure of immune cell parameters**

161 To study the impact of age on the immune parameters, 3  $\mu$ L of haemolymph  
162 were collected per individual. A hole was bored in the middle of the 6<sup>th</sup> segment and 3  
163  $\mu$ L of haemolymph were collected with an eyedropper and deposited promptly in 15  $\mu$ L  
164 of MAS-EDTA (EDTA 9 mM, Trisodium citrate 27 mM, NaCl 336 mM, Glucose 115  
165 mM, pH 7, (Rodriguez et al., 1995)). Then, 6  $\mu$ L of Trypan blue at 0.4% (Invitrogen)  
166 were added to permit the coloration of dead cells. Thereafter, 10  $\mu$ L of this solution  
167 were deposited in (Invitrogen Countess®) counting slide (Thermofisher). The immune  
168 cell density, the immune cell viability and the immune cell size were evaluated using  
169 an automated Cell Counter (Invitrogen Countess®).

170

### 171 **Measure of $\beta$ -galactosidase activity**

172 To test the impact of age on  $\beta$ -galactosidase activity, individuals were dissected  
173 separately in Ringer (Sodium Chloride 394 mM, Potassium Chloride 2 mM, Calcium  
174 Chloride 2 mM, Sodium Bicarbonate 2 mM) and nerve cord was removed. Nerve cords  
175 were chosen because they are not regenerated during molting. To obtain a sufficient  
176 quantity of protein, we made pools of five nerve cords (from five different individuals of  
177 the same age). The five nerve cords were filed in 500  $\mu$ L of Lyse Buffer 1X (CHAPS 5  
178 mM, Citric acid 40 mM, Sodium Phosphate 40 mM, Benzamidine 0.5 mM, PMSF 0.25  
179 mM, pH = 6) (Gary and Kindell, 2005). Samples were centrifuged at 15000g at 4°C for  
180 30 minutes. The supernatant was taken and kept at -80°C until its utilization. The  
181 protein concentration was determined by the BCA assay (Thermofisher) and were  
182 homogenized at 0.1 mg/mL.



183           The  $\beta$ -galactosidase activity was measured as previously described by Gary  
184 and Kindell (2005). Briefly, 100  $\mu$ L of protein extract at the concentration of 0.1 mg/mL  
185 were added to 100  $\mu$ L of reactive 4-methylumbelliferyl-D-galactopyranoside (MUG)  
186 solution in a 96 well-microplate. The MUG reactive, in contact to  $\beta$ -galactosidase, leads  
187 by hydrolysis to the synthesis of 4-methylumbelliferone (4-MU), which is detectable  
188 using fluorescent measurement. Measures were performed by the multimode  
189 microplate reader Mithras LB940 HTS III, Berthold; excitation filter: 120 nm, emission  
190 filter 460 nm, for 120 minutes. Two technical replicates were measured for each pool.

191

## 192   **2.4 Step 2: Assessing the role of changes in temperature and photoperiod on** 193 **senescence**

194           To measure the effect of temperature and photoperiod on senescence, we used  
195 120 individuals by experimental (or control) condition (i.e. natural photoperiod,  
196 stimulating photoperiod, 10°C, 20°C and 28°C) composed of 1 year old individuals (60  
197 females and 60 males). At the beginning of the experience, the same quantity of soil  
198 and 5g of dry food were weighed, rehydrated, and disposed in boxes (length x width x  
199 height: 26.5 x 13.5 x 7.5 cm). To test the impact of photoperiod, we exposed *A. vulgare*  
200 to either natural photoperiod (corresponding to the photoperiod observed from January  
201 to March at Poitiers) as controlled conditions or a photoperiod stimulating woodlouse  
202 reproduction (18:6 D/N) as experimental conditions at a temperature of 20°C. To test  
203 the effect of temperature, we exposed *A. vulgare* to three different temperatures: 20°C  
204 corresponding to controlled conditions, 10°C corresponding to supposed stressful cold  
205 conditions, and 28°C corresponding to supposed stressful “hot” conditions. After 60  
206 days of exposure at the five different conditions, individuals were enumerated to  
207 estimate survival. Survivors were then maintained in normal laboratory conditions (i.e.  
208 at 20°C under natural photoperiod) during two months until the measures of cellular  
209 senescence using senescence biomarkers previously developed. The survival at  
210 different temperatures was estimated from 120 individuals. To estimate the cellular  
211 senescence on biomarkers of senescence, 30 individuals from each sex were collected  
212 from each environmental condition except at 28°C, when high mortality forced us to  
213 collect only 20 males and 25 females. The measure of immune cell parameters (Cf.  
214 2.3) was realized at the individual scale when the measurement of the  $\beta$ -galactosidase  
215 (Cf. 2.3) required a pool of 5 nerve cords (i.e. from 5 individuals) to obtain enough  
216 biological material. In this way, the hemolymph sampling was achieved in each

217 individual before dissection of the animals and reunification of the nerve cords of 5  
218 animals.

219

## 220 **2.5 Statistical analysis**

221 The  $\beta$ -galactosidase activity was analyzed with linear mixed effect models using  
222 the R package lme4 (Bates et al., 2014). As two technical replicates were measured  
223 for each pool, the model including the pools fitted as a random effect and age,  
224 photoperiod or temperature, and sex and their two-way interactions as fixed factors.  
225 Linear models with Gaussian distribution were fitted to analyze variation in the cell size  
226 and viability. For the cell density, a linear model of the cell number (log-transformed,  
227 Ives, 2015) was fitted. Survival in different conditions of temperature and photoperiod  
228 was analyzed with generalized models (with a binomial error). All results were obtained  
229 by stepwise backward selection model. The effect size of age, temperature, and  
230 photoperiod on the  $\beta$ -galactosidase activity and immune parameters was measured by  
231 rescaling and standardized slopes were reported as a measure of effect size  
232 (Schielzeth, 2010).

233

## 234 **3. Results**

### 235 **3.1 Step 1: development of biomarkers of senescence in *A. vulgare***

236 The  $\beta$ -galactosidase activity was higher in old individuals (i.e. 2-years-old) than  
237 in young ones (i.e. 6-months-old) ( $X^2_1=6.15$ ,  $p=0.013$ , Figure 2, Figure 3A). We also  
238 detected a sex effect with a higher  $\beta$ -galactosidase activity in females than in males  
239 ( $X^2_1=7.26$ ,  $p=0.007$ , Figure 2, Figure 3A).

240

241

242

243

244

245

246

247

248



249  
250  
251  
252  
253  
254  
255  
256  
257  
258  
259  
260  
261  
262  
263  
264  
265  
266

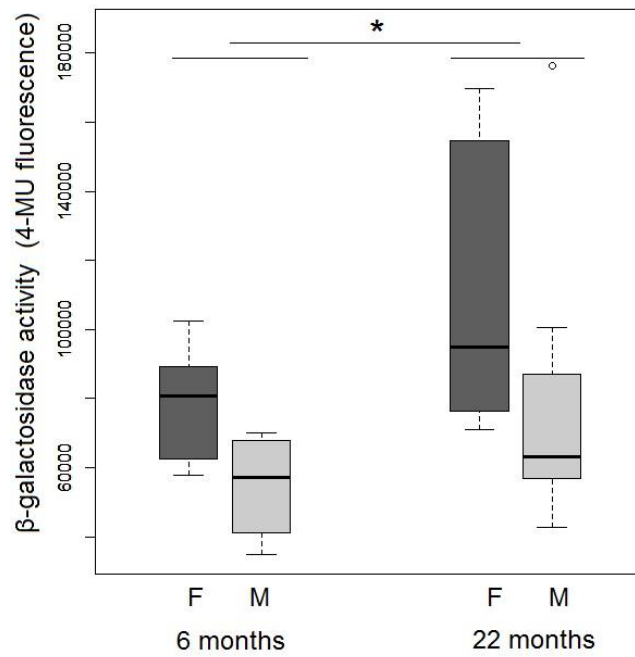

**Figure 2: β-galactosidase activity according to age and sex in *A. vulgare* (F=females, M=males)**

The thick line depicts the median, the box the interquartile range, and the whisker are bounded to the most extreme data point within 1.5 the interquartile range. The outliers outside this range are displayed as open circles.  $N=24$  pools of 5 individuals. \*  $p<0.05$

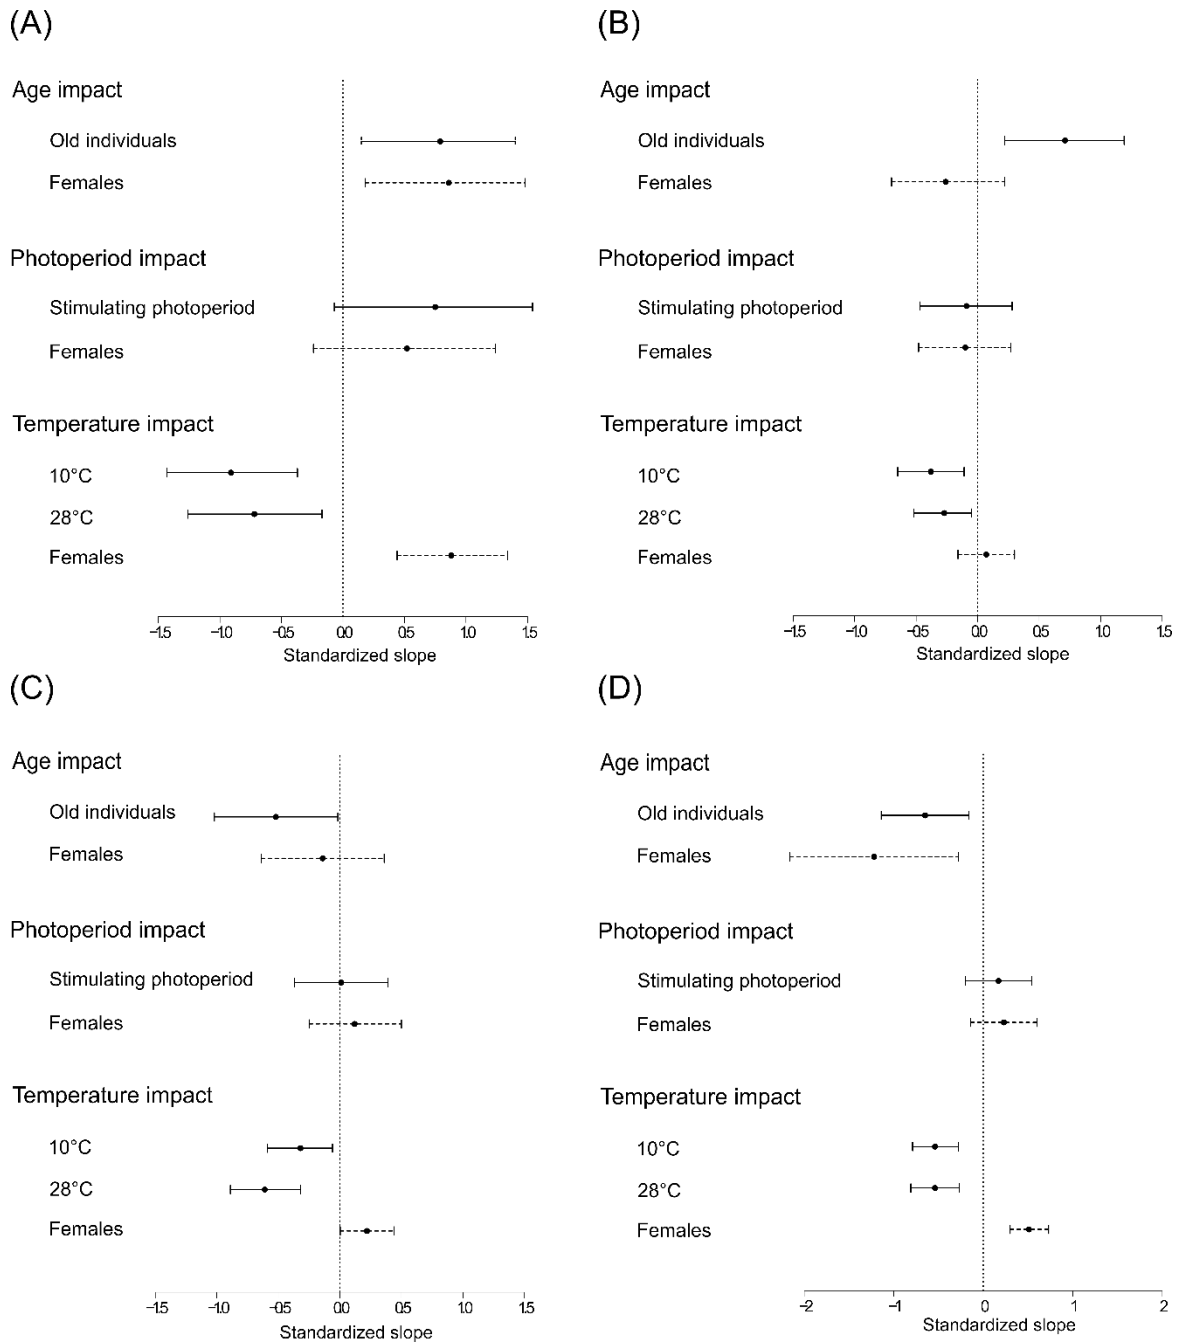

**Figure 3: Effect size of age and environmental stressors on the  $\beta$ -galactosidase activity (A), immune cell size (B), immune cell density (C) and immune cell viability (D)**

This figure synthesizes the effect size with bootstrapped 95% CI of age and non-optimal photoperiod and temperatures (solid lines), with the sex effect (dotted line) for each senescence biomarkers studied. In each case, the effect is relative to the control condition (young individuals for old individuals, natural photoperiod for stimulating photoperiod and temperature 20°C for temperatures 10°C and 20°C) and for the sex, females were compared to males.

269           Age had a statistically significant effect on cell size ( $F_{1,58}=8.54$ ,  $p=0.005$ , Figure  
270 3B, Figure 4A). Cell size was larger in 3-years-old than in 1-year-old individuals.  
271 Conversely, the cell density was higher in 1-year-old than in 3-years-old individuals  
272 ( $F_{1,58}=4.33$ ,  $p=0.0$ , Figure 3C, Figure 4B). Concerning the immune cell viability, a  
273 statistically significant interaction occurred between age and sex, with a relatively lower  
274 immune cell viability in 3-years-old females ( $F_{3,56}=6.85$ ,  $p=0.01$ , standardized slope =  
275  $-1.22$ , 95%CI =  $[-2.16; -0.28]$ ). No sex effect was detected on cell size ( $F_{2,57}=0.76$ ,  
276  $p=0.38$ , Figure 3B, Figure 4A) or cell density ( $F_{2,57}=0.32$ ,  $p=0.57$ , Figure 3C, Figure  
277 4B).

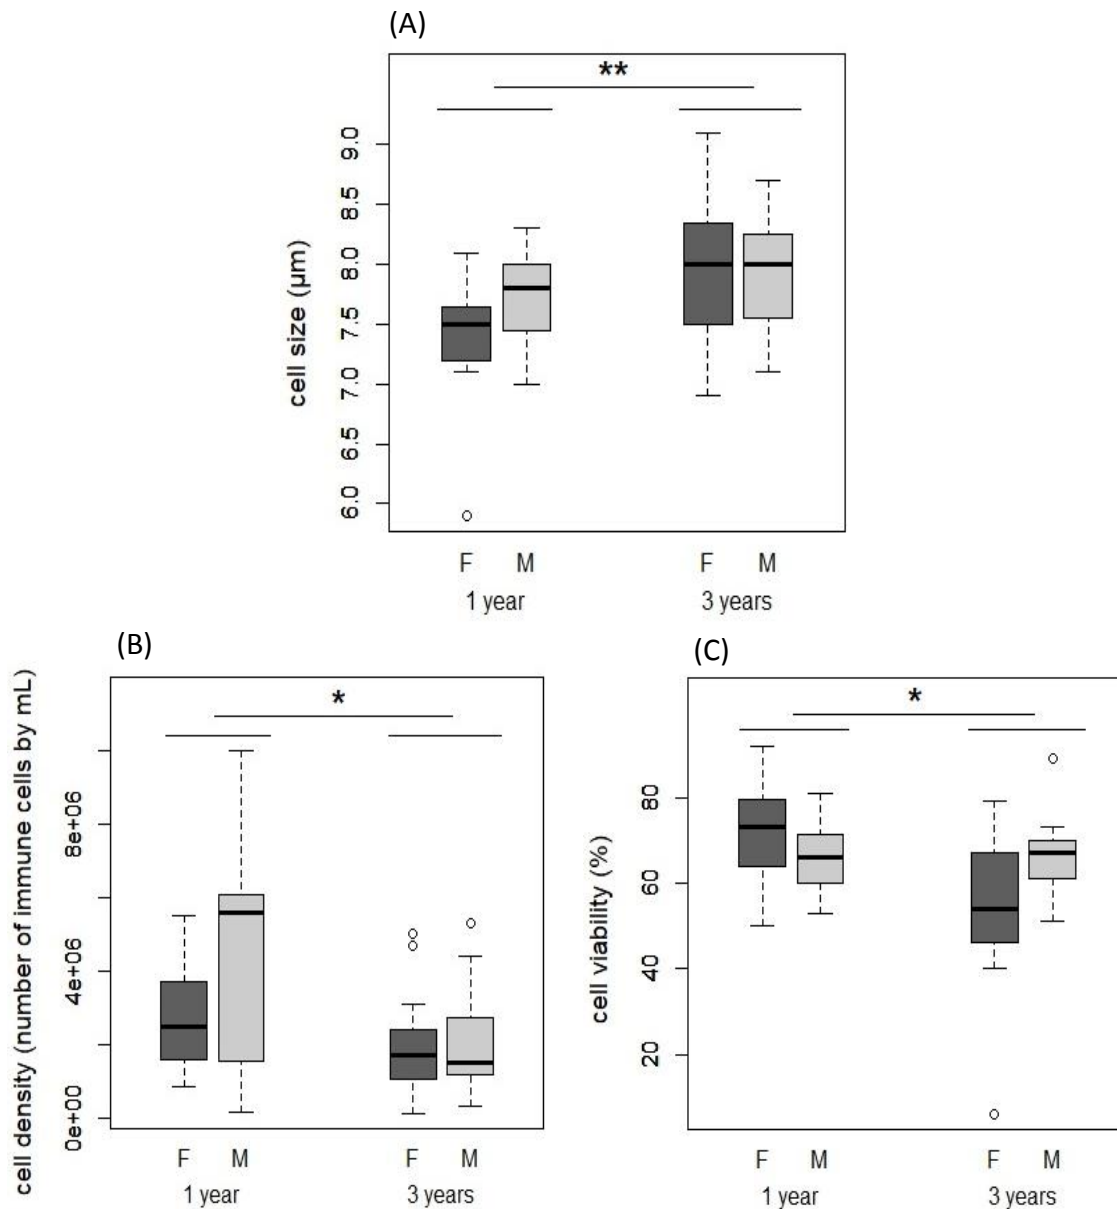

**Figure 4: Immune cell size (A), density (B) and viability (C) according to age and sex in *A. vulgare* (F=females, M=males)**

The thick line depicts the median, the box the interquartile range, and the whisker are bounded to the most extreme data point within 1.5 the interquartile range. The outliers outside this range are displayed as open circles.

N= 60 individuals: 15 1-year-old females, 15 1-year-old males, 15 3-years-old females and 15 3-years-old males. \*  $p < 0.05$ , \*\*  $p < 0.01$

278

279

## 280 3.2 Step 2: Assessing the role of changing temperature and photoperiod on 281 senescence

282

### 283 3.2.1 Photoperiod

284 Stimulating photoperiod did not have any detectable influence on survival in  
285 each sex ( $X^2_1=0.20$ ,  $p=0.65$  and  $X^2_1=1.96$ ,  $p=0.16$  for males and females, respectively)  
286 but led to a higher  $\beta$ -galactosidase activity, ( $X^2_1=3.86$ ,  $p=0.05$ , Figure 3A, Figure 5)  
287 and did not influence the size ( $F_{1,108}=0.264$ ,  $p=0.61$ , Figure 3B, Figure 6A) density  
288 ( $F_{1,108}=0.54$ ,  $p=0.54$ , Figure 3C, Figure 6B) or viability ( $F_{1,108}=0.83$ ,  $p=0.36$ , Figure 3D,  
289 Figure 6C) of immune cells.

290 Sex did not impact significantly the  $\beta$ -galactosidase activity ( $X^2_1=1.96$ ,  $p=0.16$ ,  
291 Figure 3A, Figure 5), the cell size ( $F_{2,108}=0.32$ ,  $p=0.57$ , Figure 3A, Figure 6A), density  
292 ( $F_{2,108}=0.41$ ,  $p=0.52$ , Figure 3C, Figure 6B) or viability ( $F_{2,108}=1.50$ ,  $p=0.22$ , Figure 3D,  
293 Figure 6C).

294

295

296

297

298

299

300

301

302

303

304

305

306

307

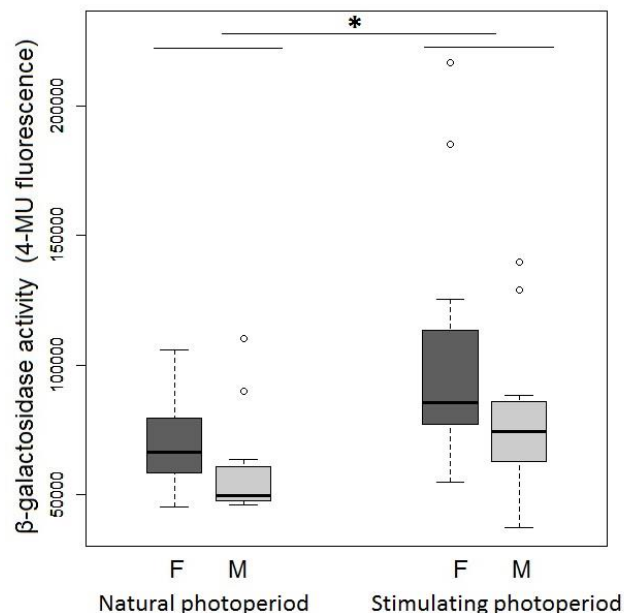

308

309

310

311

312

**Figure 5: Impact of changes in photoperiod on  $\beta$ -galactosidase activity in *A. vulgare* (F=females, M=males)**

The thick line depicts the median, the box the interquartile range, and the whisker are bounded to the most extreme data point within 1.5 the interquartile range. The outliers outside this range are displayed as open circles.  $N=24$  pools of 5 individuals, 6 pools by sex and condition \*  $p<0.05$

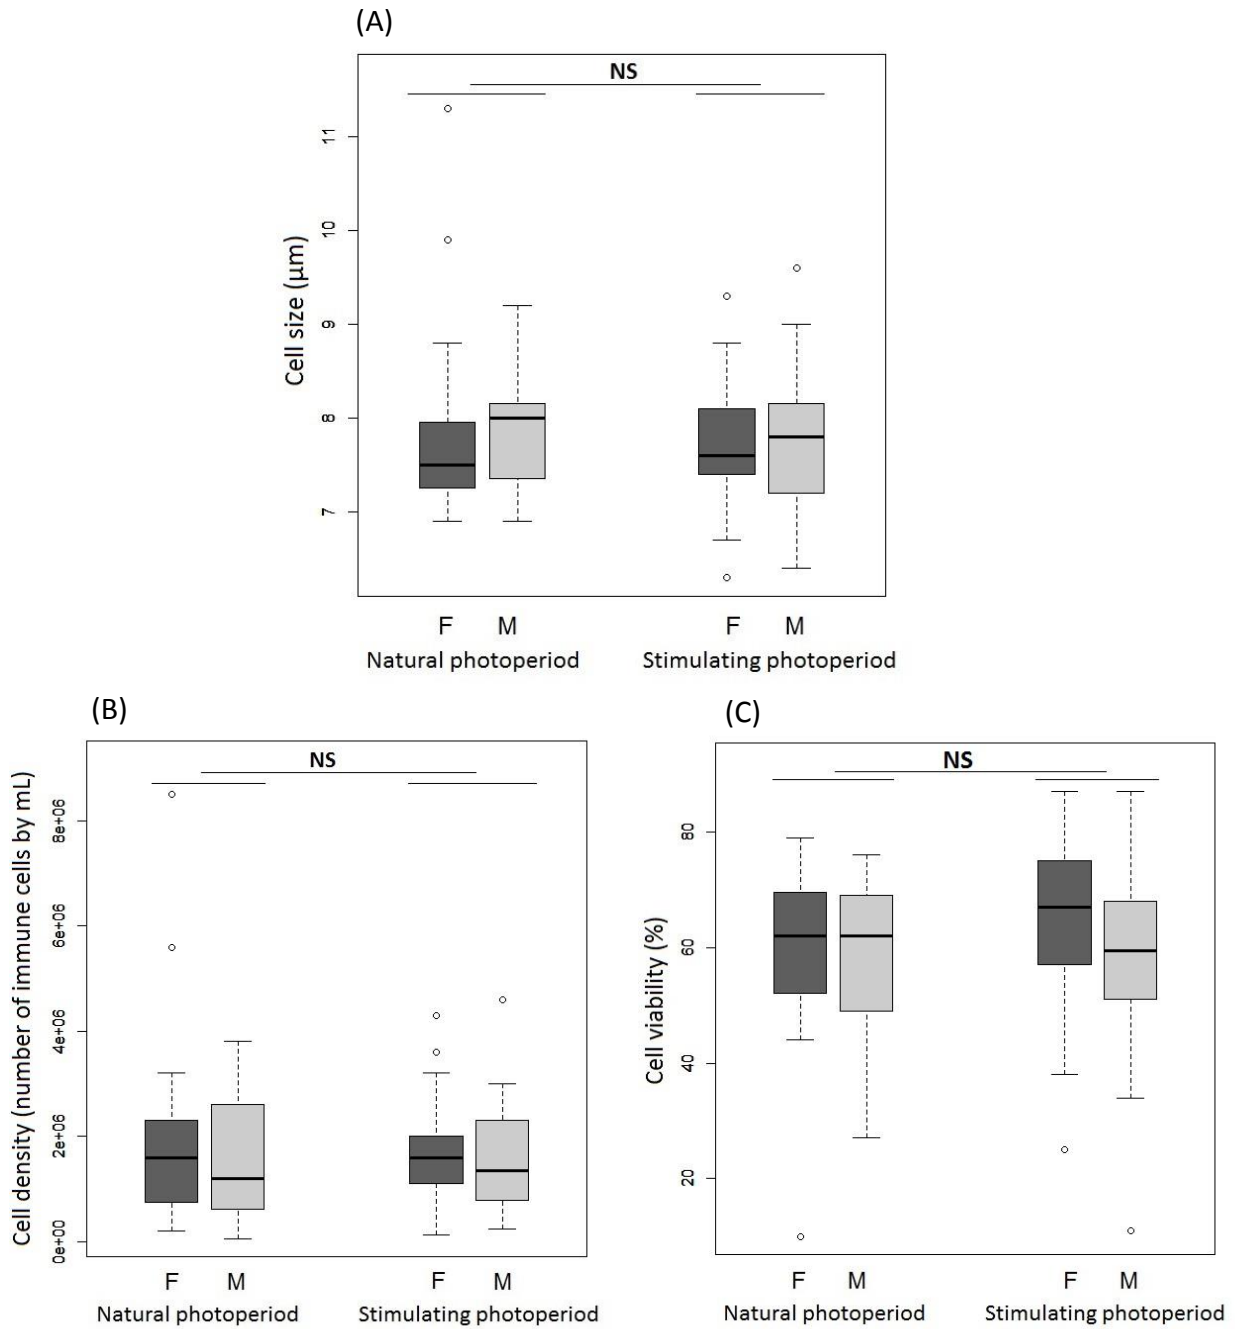

**Figure 6: Impact of changes in photoperiod on immune cell size (A), density (B) and viability (C) in *A. vulgare* (F=females, M=males)**

The thick line depicts the median, the box the interquartile range, and the whisker are bounded to the most extreme data point within 1.5 the interquartile range. The outliers outside this range are displayed as open circles.

$N=120$  individuals, 30 females in natural photoperiod; 30 males in natural photoperiod; 30 females in stimulating photoperiod and 30 males in stimulating photoperiod. NS: No significant effect

313

314

### 315 3.2.2 Temperature

316 At 28°C, the survival of animals decreased ( $X^2_1=47.48$ ,  $p<0.001$ ). However, at

317 10°C, survival of animals was not impacted ( $X^2_1=0.42$ ,  $p=0.51$ ). Temperature had an



318 influence on the  $\beta$ -galactosidase activity ( $X^2_2=12.2$ ,  $p=0.002$ , Figure 3A, Figure 7), on  
319 the cell size ( $F_{2,291}=7.96$ ,  $p=0.01$ , Figure 3B, Figure 8A), but also on cell density  
320 ( $F_{3,290}=9.24$ ,  $p=0.001$ , Figure 3C, Figure 8B) and viability ( $F_{3,290}=19.37$ ,  $p<0.001$ ,  
321 Figure 3D, Figure 8C). In fact,  $\beta$ -galactosidase activity showed lower values in the two  
322 stressful temperature conditions (i.e. 10°C ( $X^2_1=9.67$ ,  $p=0.002$ ) and 28°C ( $X^2_1=3.85$ ,  
323  $p=0.05$ )) than in the control condition (i.e. 20°C) (Figure 3A, Figure 7). Under stressful  
324 temperature of 10°C cells were smaller than in temperature 20°C ( $F_{2,207}=9.24$ ,  
325  $p=0.006$ , Figure 3B, Figure 8A). The density of immune cells was lower under the  
326 stressful temperature 10°C ( $X^2_1=18.96$ ,  $p<0.001$ ) and 28°C ( $X^2_1=7.06$ ,  $p=0.008$ )  
327 (Figure 3C, Figure 8B) as the cell viability (Respectively:  $X^2_1=15.98$ ,  $p<0.001$ ;  
328  $X^2_1=15.80$ ,  $p<0.001$ , Figure 3D, Figure 8C).

329

330 A sex effect was also detected with a higher  $\beta$ -galactosidase activity in females  
331 than in males ( $X^2_1=16.95$ ,  $p<0.001$ , Figure 3A, Figure 7). The cell density was higher  
332 in females ( $F_{3,290}=4.01$ ,  $p=0.05$ , Figure 3C, Figure 8B) as was the cell viability  
333 ( $F_{3,290}=19.61$ ,  $p<0.001$ , Figure 3D, Figure 8C). No detectable difference occurred  
334 between females and males in cell size ( $F_{3,290}=0.46$ ,  $p=0.49$ , Figure 3B, Figure 8A).

335

336

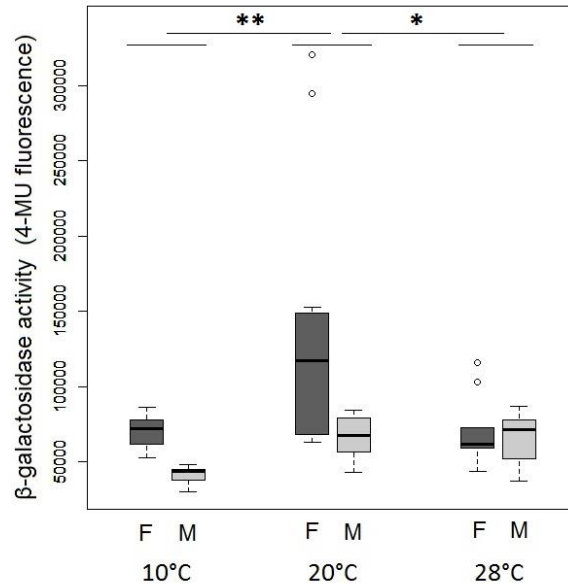

**Figure 7: Impact of changes in temperature in  $\beta$ -galactosidase activity in *A. vulgare* (F=females, M=males)**

The thick line depicts the median, the box the interquartile range, and the whisker are bounded to the most extreme data point within 1.5 the interquartile range. The outliers outside this range are displayed as open circles.  $N=21$  pools of 5 individuals, 6 pools by sex and condition excepted in 28°C: 4 pools for males and 5 for females \*  $p<0.05$ , \*\*  $p<0.01$

337

338

339

340

341

342

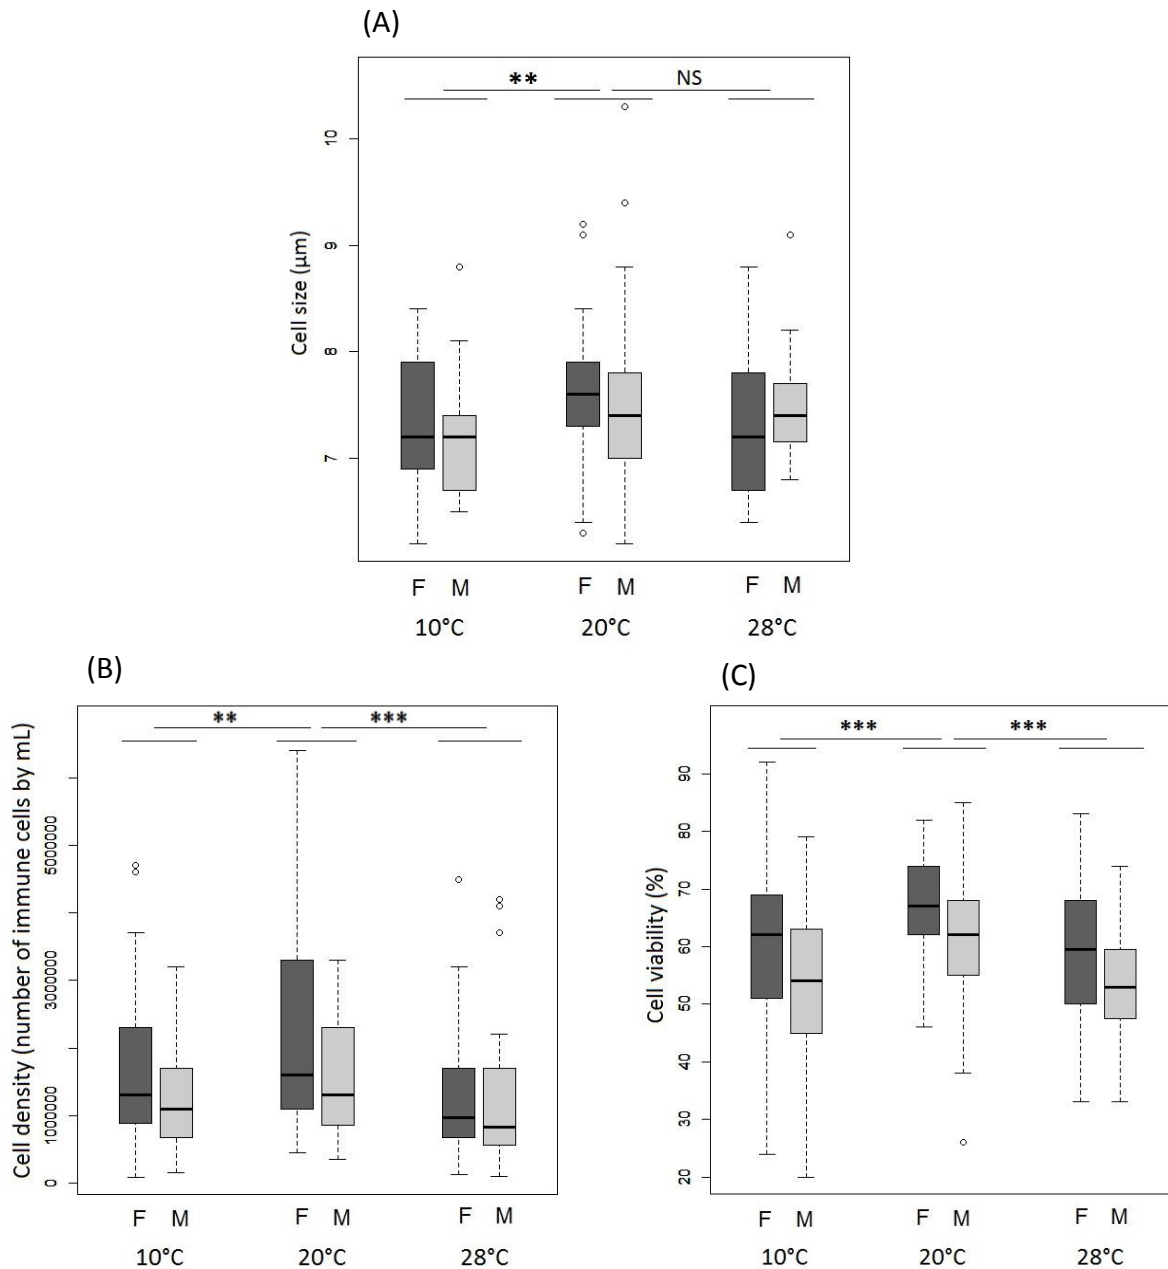

**Figure 8: Impact of changes in temperature on immune cell size (A), density (B) and viability (C) in *A. vulgare* (F=females, M=males)**

The thick line depicts the median, the box the interquartile range, and the whisker are bounded to the most extreme data point within 1.5 the interquartile range. The outliers outside this range are displayed as open circles.

N=165 individuals: 30 females at 10°C, 30 males at 10°C, 30 females at 20°C, 30 males at 20°C, 25 females at 28°C and 20 males at 28°C. \*  $p < 0.05$ , \*\*  $p < 0.01$ , \*\*\*  $p < 0.001$ , NS: no significant effect

343

344

345

346 **4. Discussion**

347 To understand the diversity of senescence patterns described across the tree  
348 of life, the role of interplaying environmental factors must be identified. Our  
349 experiments confirm that  $\beta$ -galactosidase activity in nerve cords and immune cell  
350 parameters can be reliably used as biomarkers of senescence. Here, we provide clear  
351 evidence that changes in photoperiod and temperature influence biomarkers of  
352 senescence in *A. vulgare* and temperature influences survival too. These results  
353 suggest that environmental condition likely shape senescence patterns in *A. vulgare*.

354

355 As expected, we reported both increasing  $\beta$ -galactosidase activity and  
356 increasing size of immune cells at old age. The density and viability of these immune  
357 cells were both lower in old than in young individuals. These results prove the presence  
358 of cellular senescence in *A. vulgare* and suggest sex-specific patterns of senescence  
359 with higher  $\beta$ -galactosidase activity and lower immune cell viability in females than in  
360 males at old age. Between-sex differences in lifespan have been reported in *A. vulgare*  
361 with a longer lifespan in males than in females (Geiser, 1934; Paris and Pitelka, 1962).  
362 Exact differences in actuarial senescence patterns remain to be quantified in *A. vulgare*  
363 but recent reviews have revealed that such differences are common in both vertebrates  
364 and invertebrates (Tidière et al., 2016; Marais et al., 2018 for reviews) (Tidière et al.  
365 2015; Marais et al. 2018 for reviews). One of the main theory proposed to explain sex  
366 differences in longevity senescence patterns relies on different resource allocation  
367 strategies between sexes (Bonduriansky et al., 2008; Vinogradov, 1998), which was  
368 already evoked to explain the shorter lifespan observed in females *A. vulgare* (Paris  
369 and Pitelka, 1962). In this species, females have to allocate energy to the formation of  
370 a specific reproductive moult and then of a *marsupium* to lay and protect the eggs  
371 (Hornung, 2011; Warburg, 1987), leading them to allocate more energy to reproduction  
372 than males. Females might therefore have a lower amount of resources to allocate in  
373 mechanisms against cellular senescence (Kirkwood, 1977; Kirkwood and Rose, 1991).

374

375 Here, we aimed to test the impact of environmental conditions on woodlouse  
376 senescence by using two distinct environmental stressors: the photoperiod and the  
377 temperature. While the elongation of the day light caused an increase of the  $\beta$ -  
378 galactosidase activity without any negative impact on survival and immune cells, cold  
379 condition led to smaller cell size. At 28°C (hot condition), survival being affected, we  
380 cannot totally exclude the hypothesis that the dead individuals did not have exactly the

381 same profile as the survivors on the measured biomarkers. Anyhow, lower and higher  
382 temperatures than 20°C seems to induce lower  $\beta$ -galactosidase activity and decreased  
383 cell density and viability. Results obtained in biomarkers were highly different and  
384 underlined the important role of environmental factors on senescence. In *Drosophila*  
385 *melanogaster*, exposition to high temperature lead the shortening of the lifespan  
386 (Garcia et al., 2010) while caloric restriction often leads to extended lifespan in different  
387 species, from rats to worms (Koubova, 2003). In our study on *A. vulgare*, we observed  
388 that different environmental stresses could also lead opposite effects on the same  
389 biomarkers. These results suggest that stress effects observed in lifespan need to be  
390 study at the cellular scale to understand phenomenon implied.

391  
392 Moreover, old females had a higher  $\beta$ -galactosidase activity and a better  
393 immune cell density and viability than males in stressed conditions. These results could  
394 be explained by a more effective immune system in females as often observed in the  
395 living world (Nunn et al., 2009). However, previous study in *A. vulgare* suggests the  
396 opposite: in Sicard et al. (2011), one-years-old males showed a higher cell density than  
397 females of the same age. We supposed that, according to their life history traits  
398 different gender strategies exist in *A. vulgare* as suggested previously in Paris and  
399 Pitelka (1962) and our study indicates that these strategies are shaped by  
400 environmental conditions.

401

## 402 **5. Conclusion**

403 Our study confirms that *A. vulgare* presents all characteristics required to study  
404 senescence. Our findings in this species support the hypothesis that the diversity of  
405 senescence patterns observed among species results from complex interactions  
406 between sex and environmental conditions. The development of a variety of  
407 biomarkers could allow getting a deeper understanding of the impact of environmental  
408 conditions on senescence patterns. Assessing how different environmental stressors  
409 influence biomarkers should help to identify the drivers of the great diversity of  
410 senescence patterns in the living world.

411

## 412 **Acknowledgements**

413 We would like to thank Sylvine Durand, Isabelle Giraud and Bouziane Moumen  
414 for our constructive discussions as well as Maryline Raimond and Alexandra Lafitte for

415 technical assistance. We would also like to thank Richard Cordaux and Xavier Bonnet  
416 for their constructive comments.

417

## 418 **Funding**

419 This work was supported by the 2015–2020 State-Region Planning Contract  
420 and European Regional Development Fund and intramural funds from the Centre  
421 National de la Recherche Scientifique and the University of Poitiers. J.F.L. and J.M.G.  
422 are supported by a grant from the Agence Nationale de la Recherche (ANR-15-CE32-  
423 0002-01 to J.F.L.). This work has also received funding from the "Appel à projets de  
424 recherche collaborative inter-équipes 2016-2017" by the laboratory EBI.

425

426

## 427 **Bibliography**

- 428 Adler, M.I., Cassidy, E.J., Fricke, C., Bonduriansky, R., 2013. The lifespan-  
429 reproduction trade-off under dietary restriction is sex-specific and context-  
430 dependent. *Exp. Gerontol.* 48, 539–548.  
431 <https://doi.org/10.1016/j.exger.2013.03.007>
- 432 Baker, G.T., Sprott, R.L., 1988. Biomarkers of aging. *Exp. Gerontol.*, Special Issue  
433 Biomarkers of Aging 23, 223–239. [https://doi.org/10.1016/0531-](https://doi.org/10.1016/0531-5565(88)90025-3)  
434 [5565\(88\)90025-3](https://doi.org/10.1016/0531-5565(88)90025-3)
- 435 Bates, D., Mächler, M., Bolker, B., Walker, S., 2014. Fitting linear mixed-effects models  
436 using lme4. *ArXiv Prepr. ArXiv14065823*.
- 437 Beirne, C., Delahay, R., Young, A., 2015. Sex differences in senescence: the role of  
438 intra-sexual competition in early adulthood. *Proc. R. Soc. B Biol. Sci.* 282,  
439 20151086. <https://doi.org/10.1098/rspb.2015.1086>
- 440 Berger, V., Lemaître, J.-F., Allainé, D., Gaillard, J.-M., Cochas, A., 2018. Early and adult  
441 social environments shape sex-specific actuarial senescence patterns in a  
442 cooperative breeder. *Am. Nat.* 192, 525–536. <https://doi.org/10.1086/699513>
- 443 Bérubé, C.H., Festa-Bianchet, M., Jorgenson, J.T., 1999. Individual differences,  
444 longevity, and reproductive senescence in bighorn ewes. *Ecology* 80, 2555–  
445 2565.
- 446 Bonduriansky, R., Maklakov, A., Zajitschek, F., Brooks, R., 2008. Sexual selection,  
447 sexual conflict and the evolution of ageing and life span. *Funct. Ecol.* 22, 443–  
448 453. <https://doi.org/10.1111/j.1365-2435.2008.01417.x>
- 449 Campisi, J., di Fagagna, F. d'Adda, 2007. Cellular senescence: when bad things  
450 happen to good cells. *Nat. Rev. Mol. Cell Biol.* 8, 729.
- 451 Cheynel, L., Lemaître, J.-F., Gaillard, J.-M., Rey, B., Bourgoin, G., Ferté, H., Jégo, M.,  
452 Débias, F., Pellerin, M., Jacob, L., Gilot-Fromont, E., 2017. Immunosenescence  
453 patterns differ between populations but not between sexes in a long-lived  
454 mammal. *Sci. Rep.* 7. <https://doi.org/10.1038/s41598-017-13686-5>
- 455 Clutton-Brock, T., Isvaran, K., 2007. Sex differences in ageing in natural populations  
456 of vertebrates. *Proc. R. Soc. B Biol. Sci.* 274, 3097–3104.  
457 <https://doi.org/10.1098/rspb.2007.1138>



- 458 Dimri, G.P., Lee, X., Basile, G., Acosta, M., Scott, G., Roskelley, C., Medrano, E.E.,  
459 Linskens, M., Rubelj, I., Pereira-Smith, O., 1995. A biomarker that identifies  
460 senescent human cells in culture and in aging skin in vivo. *Proc. Natl. Acad. Sci.*  
461 92, 9363–9367.
- 462 Fontana, L., Partridge, L., Longo, V.D., 2010. Extending healthy life span--from yeast  
463 to humans. *Science* 328, 321–326. <https://doi.org/10.1126/science.1172539>
- 464 Garcia, A.M., Calder, R.B., Dollé, M.E.T., Lundell, M., Kapahi, P., Vijg, J., 2010. Age-  
465 and temperature-dependent somatic mutation accumulation in *Drosophila*  
466 *melanogaster*. *PLoS Genet.* 6, e1000950.  
467 <https://doi.org/10.1371/journal.pgen.1000950>
- 468 Gary, R.K., Kindell, S.M., 2005. Quantitative assay of senescence-associated  $\beta$ -  
469 galactosidase activity in mammalian cell extracts. *Anal. Biochem.* 343, 329–  
470 334.
- 471 Geiser, S.W., 1934. Further observations on the sex-ratios of terrestrial isopods. *Field*  
472 *Lab* 3, 7–10.
- 473 Hassall, C., Amaro, R., Ondina, P., Outeiro, A., Cordero-Rivera, A., San Miguel, E.,  
474 2017. Population-level variation in senescence suggests an important role for  
475 temperature in an endangered mollusc. *J. Zool.* 301, 32–40.
- 476 Hayflick, L., 1965. The limited in vitro lifetime of human diploid cell strains. *Exp. Cell*  
477 *Res.* 37, 614–636. [https://doi.org/10.1016/0014-4827\(65\)90211-9](https://doi.org/10.1016/0014-4827(65)90211-9)
- 478 Herbig, U., Ferreira, M., Condell, L., Carey, D., Sedivy, J.M., 2006. Cellular senescence  
479 in aging primates. *Science* 311, 1257. <https://doi.org/10.1126/science.1122446>
- 480 Hillyer, J.F., Schmidt, S.L., Fuchs, J.F., Boyle, J.P., Christensen, B.M., 2004. Age-  
481 associated mortality in immune challenged mosquitoes (*Aedes aegypti*)  
482 correlates with a decrease in haemocyte numbers: Age-associated mortality in  
483 *Aedes aegypti*. *Cell. Microbiol.* 7, 39–51. <https://doi.org/10.1111/j.1462-5822.2004.00430.x>
- 484
- 485 Hornung, E., 2011. Evolutionary adaptation of oniscidean isopods to terrestrial life:  
486 Structure, physiology and behavior. *Terr. Arthropod Rev.* 4, 95–130.  
487 <https://doi.org/10.1163/187498311X576262>
- 488 Hsieh, Y.-S., Hsu, C.-Y., 2011. Honeybee trophocytes and fat cells as target cells for  
489 cellular senescence studies. *Exp. Gerontol.* 46, 233–240.  
490 <https://doi.org/10.1016/j.exger.2010.10.007>
- 491 Itahana, K., Campisi, J., Dimri, G.P., 2007. Methods to detect biomarkers of cellular  
492 senescence: the senescence-associated  $\beta$ -galactosidase assay. *Biol. Aging*  
493 *Methods Protoc.* 21–31.
- 494 Ives, A.R., 2015. For testing the significance of regression coefficients, go ahead and  
495 log-transform count data. *Methods Ecol. Evol.* 6, 828–835.  
496 <https://doi.org/10.1111/2041-210X.12386>
- 497 Jones, O.R., Scheuerlein, A., Salguero-Gómez, R., Camarda, C.G., Schaible, R.,  
498 Casper, B.B., Dahlgren, J.P., Ehrlén, J., García, M.B., Menges, E.S., Quintana-  
499 Ascencio, P.F., Caswell, H., Baudisch, A., Vaupel, J.W., 2014. Diversity of  
500 ageing across the tree of life. *Nature* 505, 169–173.  
501 <https://doi.org/10.1038/nature12789>
- 502 Kirkwood, T.B.L., 1977. Evolution of ageing. *Nature* 270, 301–304.  
503 <https://doi.org/10.1038/270301a0>
- 504 Kirkwood, T.B.L., Rose, M.R., 1991. Evolution of senescence: late survival sacrificed  
505 for reproduction. *Philos. Trans. R. Soc. Lond. B. Biol. Sci.* 332, 15–24.  
506 <https://doi.org/10.1098/rstb.1991.0028>

- 507 Koubova, J., 2003. How does calorie restriction work? *Genes Dev.* 17, 313–321.  
508 <https://doi.org/10.1101/gad.1052903>
- 509 Lawless, C., Wang, C., Jurk, D., Merz, A., Zglinicki, T. von, Passos, J.F., 2010.  
510 Quantitative assessment of markers for cell senescence. *Exp. Gerontol.* 45,  
511 772–778. <https://doi.org/10.1016/j.exger.2010.01.018>
- 512 Lawlor, L.R., 1976. Parental investment and offspring fitness in the terrestrial isopod  
513 *Armadillidium vulgare* (Latreille) (Crustacea: Oniscidea). *Evolution* 30, 775–  
514 785. <https://doi.org/10.1111/j.1558-5646.1976.tb00958.x>
- 515 Marais, G.A.B., Gaillard, J.-M., Vieira, C., Plotton, I., Sanlaville, D., Gueyffier, F.,  
516 Lemaitre, J.-F., 2018. Sex gap in aging and longevity: can sex chromosomes  
517 play a role? *Biol. Sex Differ.* 9. <https://doi.org/10.1186/s13293-018-0181-y>
- 518 Martin, G.M., Austad, S.N., Johnson, T.E., 1996. Genetic analysis of ageing: role of  
519 oxidative damage and environmental stresses. *Nat. Genet.* 13, 25–34.  
520 <https://doi.org/10.1038/ng0596-25>
- 521 Mocquard, J.P., Juchault, P., Souty-Grosset, C., 1989. The role of environmental  
522 factors (temperature and photoperiod) in the reproduction of the terrestrial  
523 isopod *Armadillidium vulgare* (Latreille, 1804). *Monogr. Monit. Zool. Ital.* 4, 455–  
524 475.
- 525 Monaghan, P., Charmantier, A., Nussey, D.H., Ricklefs, R.E., 2008. The evolutionary  
526 ecology of senescence. *Funct. Ecol.* 22, 371–378.  
527 <https://doi.org/10.1111/j.1365-2435.2008.01418.x>
- 528 Moreau, J., Rigaud, T., 2002. The shape of calcium carbonate deposits as an external  
529 marker for female reproductive status in terrestrial isopods. *J. Crustac. Biol.* 22,  
530 353–356. <https://doi.org/10.1163/20021975-99990242>
- 531 Nunn, C.L., Lindenfors, P., Pursall, E.R., Rolff, J., 2009. On sexual dimorphism in  
532 immune function. *Philos. Trans. R. Soc. B Biol. Sci.* 364, 61–69.  
533 <https://doi.org/10.1098/rstb.2008.0148>
- 534 Nussey, D.H., Coulson, T., Delorme, D., Clutton-Brock, T.H., Pemberton, J.M., Festa-  
535 Bianchet, M., Gaillard, J.-M., 2011. Patterns of body mass senescence and  
536 selective disappearance differ among three species of free-living ungulates.  
537 *Ecology* 92, 1936–1947. <https://doi.org/10.1890/11-0308.1>
- 538 Nussey, D.H., Froy, H., Lemaitre, J.-F., Gaillard, J.-M., Austad, S.N., 2013.  
539 Senescence in natural populations of animals: widespread evidence and its  
540 implications for bio-gerontology. *Ageing Res. Rev.* 12, 214–225.
- 541 Nussey, D.H., Kruuk, L.E.B., Morris, A., Clutton-Brock, T.H., 2007. Environmental  
542 conditions in early life influence ageing rates in a wild population of red deer.  
543 *Curr. Biol.* 17, R1000–R1001. <https://doi.org/10.1016/j.cub.2007.10.005>
- 544 Paris, O.H., Pitelka, F.A., 1962. Population characteristics of the terrestrial isopod  
545 *Armadillidium vulgare* in California grassland. *Ecology* 43, 229–248.
- 546 Park, Y., Kim, Y., Stanley, D., 2011. Cellular immunosenescence in adult male crickets,  
547 *Gryllus assimilis*. *Arch. Insect Biochem. Physiol.* 76, 185–194.  
548 <https://doi.org/10.1002/arch.20394>
- 549 Piazza, J.R., Almeida, D.M., Dmitrieva, N.O., Klein, L.C., 2010. Frontiers in the use of  
550 biomarkers of health in research on stress and aging. *J. Gerontol. B. Psychol.*  
551 *Sci. Soc. Sci.* 65B, 513–525. <https://doi.org/10.1093/geronb/gbq049>
- 552 Rodier, F., Campisi, J., 2011. Four faces of cellular senescence. *J. Cell Biol.* 192, 547–  
553 556. <https://doi.org/10.1083/jcb.201009094>
- 554 Rodriguez, J., Boulo, V., Mialhe, E., Bachere, E., 1995. Characterisation of shrimp  
555 haemocytes and plasma components by monoclonal antibodies. *J. Cell Sci.*  
556 108, 1043–1050.

- 557 Schielzeth, H., 2010. Simple means to improve the interpretability of regression  
558 coefficients: Interpretation of regression coefficients. *Methods Ecol. Evol.* 1,  
559 103–113. <https://doi.org/10.1111/j.2041-210X.2010.00012.x>
- 560 Sicard, M., Chevalier, F., Vlechouver, M.D., Bouchon, D., Grève, P., Braquart-Varnier,  
561 C., 2010. Variations of immune parameters in terrestrial isopods: a matter of  
562 gender, aging and Wolbachia. *Naturwissenschaften* 97, 819–826.  
563 <https://doi.org/10.1007/s00114-010-0699-2>
- 564 Smigel, J.T., Gibbs, A.G., 2008. Conglobation in the pill bug, *Armadillidium vulgare*, as  
565 a water conservation mechanism. *J. Insect Sci.* 8.  
566 <https://doi.org/10.1673/031.008.4401>
- 567 Steel, C.G.H., 1980. Mechanisms of coordination between moulting and reproduction  
568 in terrestrial isopod crustacea. *Biol. Bull.* 159, 206–218.  
569 <https://doi.org/10.2307/1541019>
- 570 Tidière, M., Gaillard, J.-M., Berger, V., Müller, D.W., Lackey, L.B., Gimenez, O.,  
571 Clauss, M., Lemaître, J.-F., 2016. Comparative analyses of longevity and  
572 senescence reveal variable survival benefits of living in zoos across mammals.  
573 *Sci. Rep.* 6, 36361.
- 574 Valenzano, D.R., Terzibasi, E., Cattaneo, A., Domenici, L., Cellerino, A., 2006.  
575 Temperature affects longevity and age-related locomotor and cognitive decay  
576 in the short-lived fish *Nothobranchius furzeri*. *Aging Cell* 5, 275–278.  
577 <https://doi.org/10.1111/j.1474-9726.2006.00212.x>
- 578 Vinogradov, A.E., 1998. Male reproductive strategy and decreased longevity. *Acta*  
579 *Biotheor.* 46, 157–160. <https://doi.org/10.1023/A:1001181921303>
- 580 Wang, C., Jurk, D., Maddick, M., Nelson, G., Martin-Ruiz, C., von Zglinicki, T., 2009.  
581 DNA damage response and cellular senescence in tissues of aging mice. *Aging*  
582 *Cell* 8, 311–323. <https://doi.org/10.1111/j.1474-9726.2009.00481.x>
- 583 Warburg, M.R., 1987. Isopods and their terrestrial environment, in: *Advances in*  
584 *Ecological Research*. Elsevier, pp. 187–242. [https://doi.org/10.1016/S0065-](https://doi.org/10.1016/S0065-2504(08)60246-9)  
585 [2504\(08\)60246-9](https://doi.org/10.1016/S0065-2504(08)60246-9)  
586
